# Supplementary material
Source: PubMed Central journal article supplement (PMC1852246)

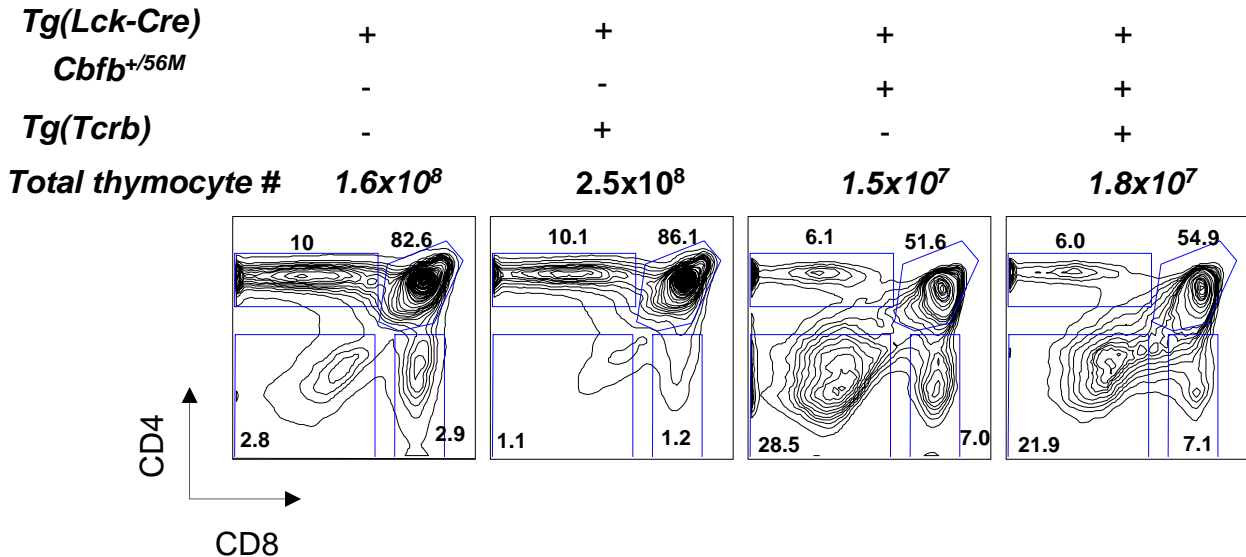

Supplement: blood_blood-2006-10-051508_1.pdf [file blood_blood-2006-10-051508_1.pdf]
